# Supplementary material
Source: PubMed Central journal article supplement (PMC11027914)
Supplement: NIHMS1985141-supplement-Supplementary_Material.pdf [file NIHMS1985141-supplement-Supplementary_Material.pdf]

# SUPPORTING INFORMATION

## Direct Evaluation of Protein-Lipid Contacts Reveals Protein Membrane Immersion and Isotropic Bicelle Structure

Thomas Schmidt,<sup>†,‡</sup> Alan J. Situ,<sup>†</sup> and Tobias S. Ulmer<sup>\*,†</sup>

<sup>†</sup>Department of Biochemistry & Molecular Medicine and Zilkha Neurogenetic Institute, Keck School of Medicine, University of Southern California, 1501 San Pablo Street, Los Angeles, CA 90033, USA

<sup>‡</sup>Present address: Laboratory of Chemical Physics, National Institute of Diabetes and Digestive and Kidney Diseases, National Institutes of Health, Bethesda, MD 20892, USA

### Table of Contents

|                                                                                                        |    |
|--------------------------------------------------------------------------------------------------------|----|
| Supplementary Figure S1. Illustration of $\alpha$ IIb and $\beta$ 3(A711P) TM peptide spectral quality | S2 |
| Supplementary Table S1. Effect of presaturation on intensity of vicinal signals                        | S3 |

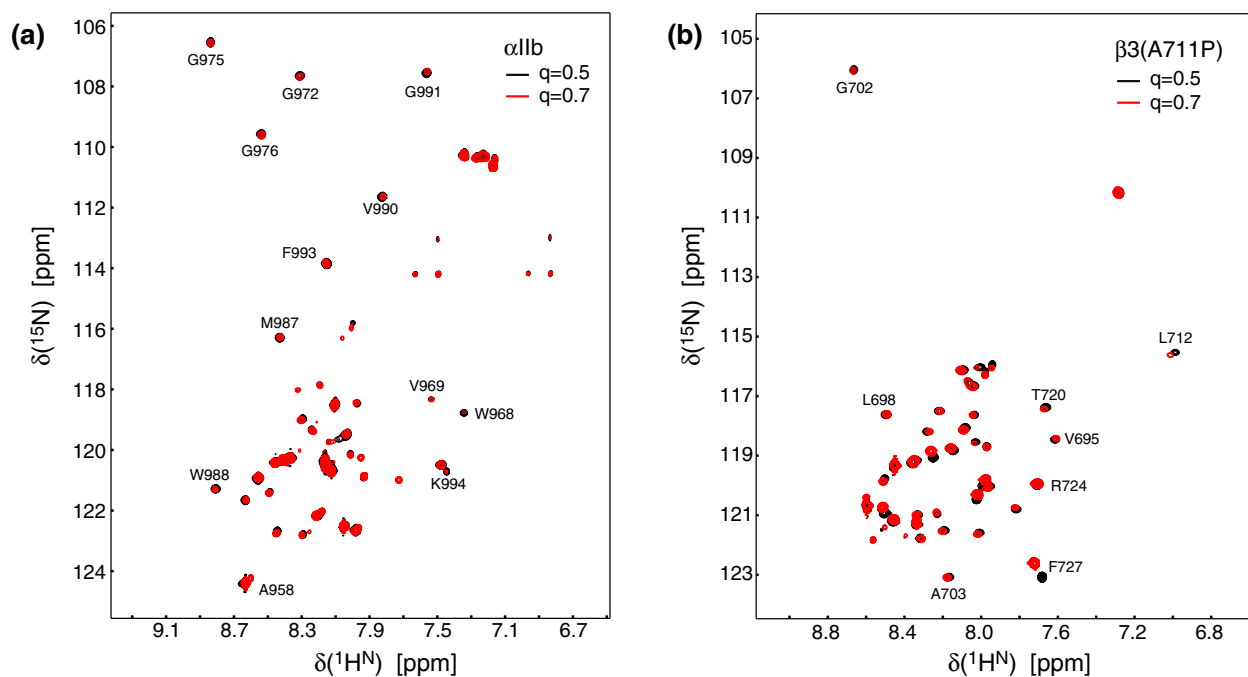

**Figure S1. Illustration of spectral quality of bicelle-immersed integrin  $\alpha$ IIb and  $\beta$ 3(A711P) TM peptides.** TROSY-type H-N correlation spectra of 1 mM of the indicated integrin TM peptides in 350 mM DHPC/175 mM POPC ( $q=0.5$  bicelles) and 400 mM DHPC/280 mM POPC ( $q=0.7$  bicelles), respectively. The solutions additionally contained 5 mM tris(2-carboxyethyl)phosphine, 0.02%  $\text{NaN}_3$ , 6%  $\text{D}_2\text{O}$ , and 25 mM  $\text{NaH}_2\text{PO}_4/\text{Na}_2\text{HPO}_4$ , pH 7.4. Spectra were recorded at 700 MHz and 35 °C. Selected backbone assignments are shown.

**Table S1. Effect of presaturation on intensity of vicinal signals.**

| Presaturation <sup>a,b</sup> | Attenuation [%]<br>DHPC(#4 CH <sub>2</sub> ) | Attenuation [%]<br>POPC(#3 CH <sub>2</sub> ) | Attenuation [%]<br>DHPC(#2 CH <sub>3</sub> ) | Attenuation [%]<br>POPC(#1 CH <sub>3</sub> ) |
|------------------------------|----------------------------------------------|----------------------------------------------|----------------------------------------------|----------------------------------------------|
| POPC(#1 CH <sub>3</sub> )    | 0                                            | 2                                            | 18                                           | 80                                           |
| DHPC(#2 CH <sub>3</sub> )    | 3                                            | 2                                            | 85                                           | 19                                           |
| POPC(#3 CH <sub>2</sub> )    | 18                                           | 87                                           | 1                                            | 4                                            |
| DHPC(#4 CH <sub>2</sub> )    | 74                                           | 25                                           | 4                                            | 1                                            |

<sup>a</sup>Peak labels refer to the numbering of DHPC and POPC resonances depicted in Figure 1a.

<sup>b</sup>Presaturation of 500 ms, B<sub>0</sub>= 700 MHz and B<sub>1</sub>= 11.2 Hz.
